# Supplementary figures and images for: A Combined mRNA- and miRNA-Sequencing Approach Reveals miRNAs as Potential Regulators of the Small Intestinal Transcriptome in Celiac Disease
Source: MDPI journal article supplement (doi:10.3390/ijms222111382), 2021-10-21

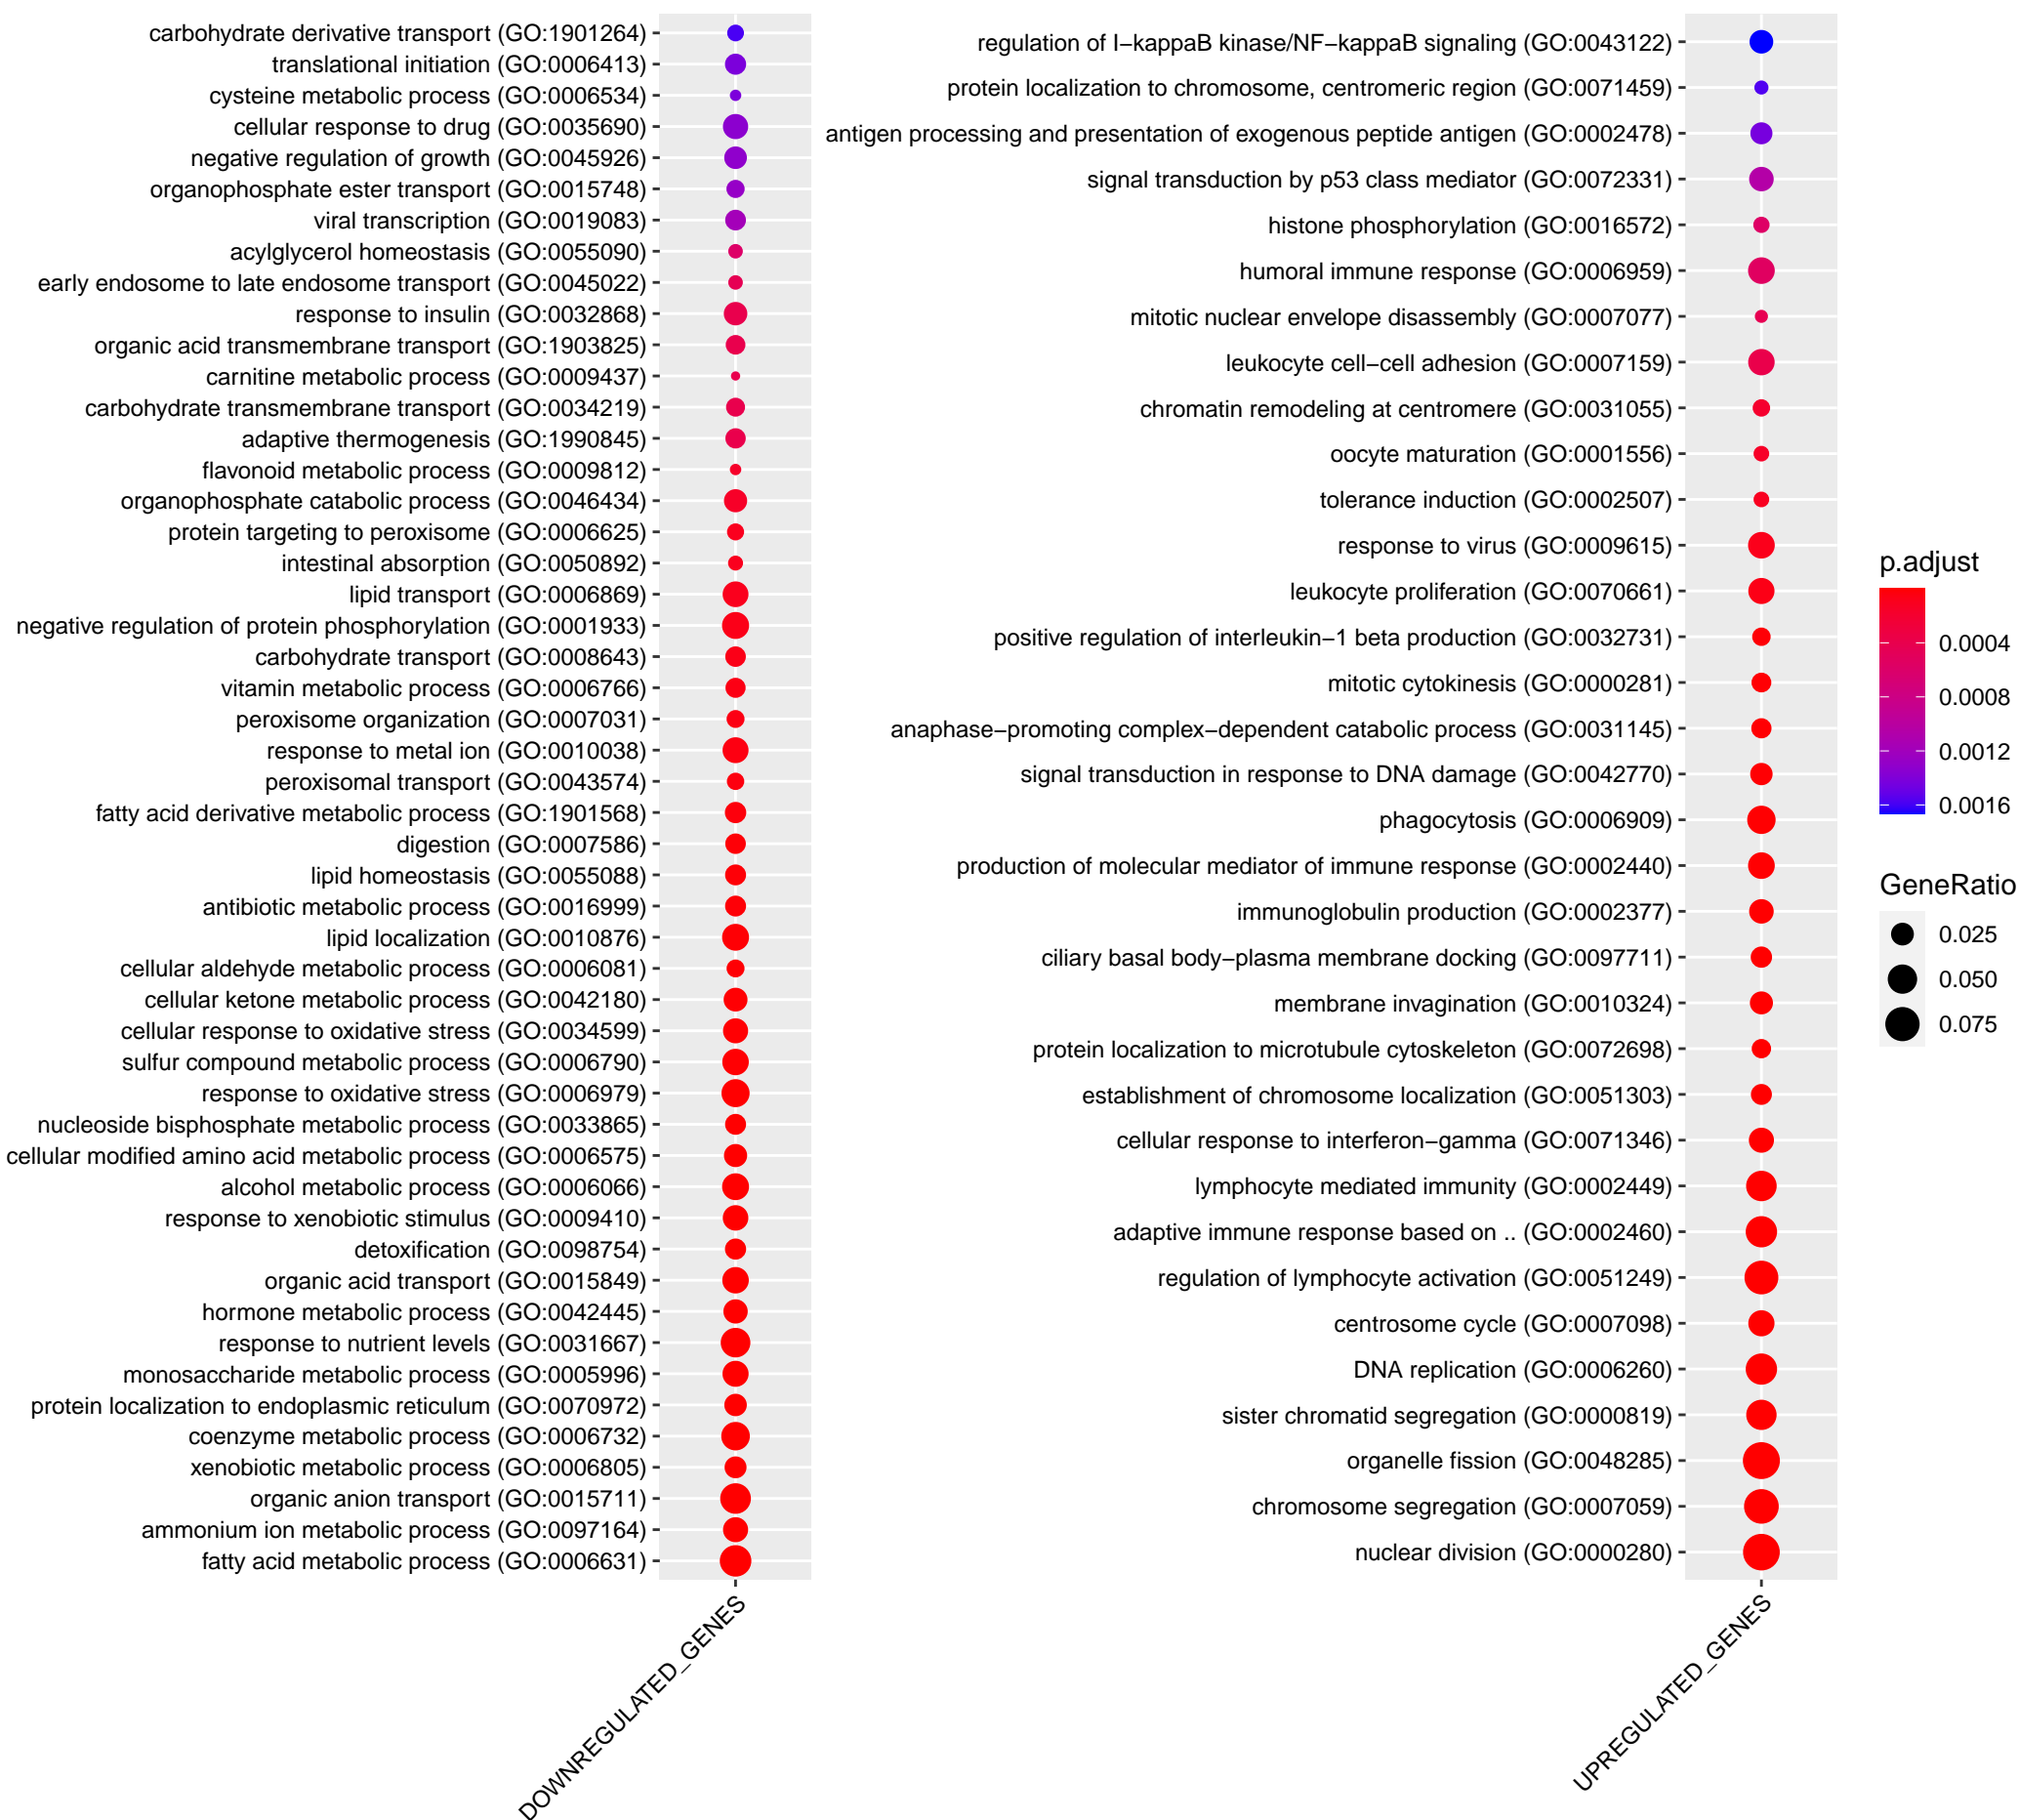

Supplement: s1 [file s1]
